# Supplementary material
Source: Royal Society of Chemistry journal article supplement (doi:10.1039/d6nj00606j)
Supplement: d6nj00606j1.pdf [file d6nj00606j1.pdf]

## Support information

### The selective cleavage of C–O linkages and efficient hydrogenation over cobalt-doped nickel phosphide catalyst

Tingting Cui,<sup>a\*</sup> Yingxiong Zhang,<sup>a\*</sup> Ting Liu,<sup>\*a</sup> Jin Jiang,<sup>a</sup> Jinhua Wang,<sup>a</sup> Yakun Tang,<sup>a</sup> Lang Liu,<sup>\*a</sup>

---

<sup>a</sup> State Key Laboratory of Chemistry and Utilization of Carbon Based Energy Resources; Key Laboratory of Energy Materials Chemistry, Ministry of Education, College of Chemistry, Xinjiang University, Urumqi 830017, China

<sup>\*</sup> Co-author

---

#### Materials

Nickell(II) chloride hexahydrate ( $\text{NiCl}_2 \cdot 6\text{H}_2\text{O}$ , 98%), ethylene glycol ( $\text{C}_2\text{H}_6\text{O}_2$ , 98%), and n-hexane ( $\text{C}_6\text{H}_{14}$ , 98%) were purchased from Tianjin Xinbote Chemical Co., Ltd. Cobalt nitrate hexahydrate ( $\text{Co}(\text{NO}_3)_2 \cdot 6\text{H}_2\text{O}$ ,  $\geq 99\%$ ) was supplied by Tianjin Zhiyuan Chemical Reagent Co., Ltd. Sodium hypophosphite monohydrate ( $\text{NaH}_2\text{PO}_2 \cdot \text{H}_2\text{O}$ , 99%) and phenyl benzyl ether ( $\text{C}_{13}\text{H}_{12}\text{O}$ ,  $>98\%$ ) were obtained from Aladdin Biochemical Technology Co., Ltd. All chemicals and reagents were used as received without further purification.

#### Catalyst preparation

In this experiment,  $\text{Ni}_{12}\text{P}_5$  served as the reference catalyst. The catalyst was synthesized using a straightforward one-step solvothermal method. First, 1.43 g (6 mmol) of  $\text{NiCl}_2 \cdot 6\text{H}_2\text{O}$  and 4.4516 g (42 mmol) of  $\text{NaH}_2\text{PO}_2 \cdot \text{H}_2\text{O}$  were dissolved in 60 mL of ethylene glycol solvent. The solution was stirred for 6 h, then transferred to a Teflon-lined autoclave, where it was heated at 180 °C for 12 h. After the reaction, the solution was cooled to room temperature, then washed and filtered. The product was dried in an oven at 60 °C to yield the black  $\text{Ni}_{12}\text{P}_5$ . The preparation of Co- $\text{Ni}_{12}\text{P}_5$  followed a similar process, except that the cobalt source ratio was varied. Co- $\text{Ni}_{12}\text{P}_5$  with cobalt concentrations of 1%, 3%, 5%, and 10% were synthesized and

labeled as 1% Co-Ni<sub>12</sub>P<sub>5</sub>, 3% Co-Ni<sub>12</sub>P<sub>5</sub>, 5% Co-Ni<sub>12</sub>P<sub>5</sub>, and 10% Co-Ni<sub>12</sub>P<sub>5</sub>, respectively. The detailed preparation process is illustrated in Figure S1.

## Characterizations

The phase composition of the synthesized catalyst was analyzed using a Bruker D8 X-ray diffractometer (XRD, Germany). The analysis was conducted within a scanning angle of 10° to 80°, utilizing a Cu-K $\alpha$  radiation source and a scanning voltage of 40 kV to determine the crystal structure of the catalyst. The morphology of the catalyst was observed with a Hitachi SU-4800 scanning electron microscope (SEM, Japan). The chemical states of the catalyst were examined using a Thermo Scientific NexsaG2 X-ray photoelectron spectrometer (XPS) with a monochromatic Al target as the X-ray source, covering an energy range of 0 eV to 1486.6 eV. The microstructure was analyzed using a Tecnai F20 high-resolution transmission electron microscope (TEM, FEI, USA). The morphology was further analyzed using a JEM-2100F high-resolution field emission transmission electron microscope (HRTEM). The acidity of the catalyst was measured by ammonia temperature-programmed desorption (NH<sub>3</sub>-TPD) using a BELCAT instrument (Japan). Before ammonia adsorption, 0.1 g of the catalyst was pretreated under a helium flow at 450 °C for 1 h, then cooled to 100 °C. The temperature was subsequently raised from 100 °C to 500 °C at a rate of 10 °C/min under a helium flow rate of 20 mL/min for ammonia desorption. The BET surface area was determined using the Brunauer-Emmett-Teller (BET) equation, and micropore properties were analyzed using the t-plot method. Pore size was calculated with the Barrett-Joyner-Halenda (BJH) equation from the N<sub>2</sub> adsorption-desorption isotherm, and total pore volume was obtained from the N<sub>2</sub> volume adsorbed at a relative pressure of 0.99. Pyridine Infrared Spectroscopy (Py-IR) spectra were recorded on a Bruker Invenio-S instrument equipped with an in-situ cell. Self-supported wafers (30 mg) of the samples were degassed at 350°C for 1 h under dynamic vacuum (<10<sup>-6</sup> Pa). After activation, the base spectrum was recorded, and then pyridine vapor was carried into the cell via a bubbler and adsorbed on the samples. Desorption of pyridine was performed under vacuum at 30°C and afterwards cooled to 250°C to

collect IR spectra. The content of Co, Ni, and P was determined on a PerkinElmer Optima 8000 spectrometer exploiting Inductively Coupled Plasma Optical Emission Spectrometry (ICP-OES).

#### DFT calculation

DFT calculations were conducted using VASP (Vienna Ab-initio Simulation Package) version 5.4. The PAW (Projector Augmented Wave) pseudopotential and the PBE (Perdew-Burke-Ernzerhof) exchange-correlation functional were employed, with a plane wave cutoff energy of 500 eV. A real-space distance of at least 15 Å was maintained for all periodic slab calculations. A 3×3×1 k-point grid was applied to calculate the pristine Ni<sub>12</sub>P<sub>5</sub> and 3% Co-NiFeCeP systems. Convergence criteria were set to 10<sup>-5</sup> eV for energy and 0.05 eV/Å for force. Spin polarization was included in all structure calculations. The DFT-D3 method was used to account for van der Waals interactions. The adsorption energy ( $E_{\text{ads}}$ ) was computed using the following equation:

$$E_{\text{ads}} = E_{\text{total}} - (E_{\text{catalyst}} + E_{\text{adsorbate}})$$

Where  $E_{\text{total}}$  was the total energy of the catalyst and adsorbate, and  $E_{\text{catalyst}}$  and  $E_{\text{adsorbate}}$  were the energies of the catalyst and adsorbate, respectively.

#### Catalysis

The catalytic hydrogenation of BPE was carried out by adding 100 mg of BPE, 50 mg of catalyst, and 20 mL of n-hexane to a 50 mL high-pressure reactor. The reactor was first purged three times with nitrogen (N<sub>2</sub>) and checked for leaks to ensure it was properly sealed. Following this, the reactor was purged three times with hydrogen (H<sub>2</sub>), and hydrogen was then introduced at pressures of 0.5 MPa, 1 MPa, 1.5 MPa, 2

MPa, and 2.5 MPa. The reactor was heated to the desired reaction temperature and maintained for 0.5 h, 1 h, 1.5 h, 2 h, and 2.5 h. After the reaction, the reactor was cooled to room temperature, and the liquid product was separated from the catalyst by filtration using a Buchner funnel. The liquid product was collected and analyzed with an Agilent 5977B GC-MS system (Agilent, USA). The analysis was conducted using an HP-5 capillary column (60 m × 250 μm × 0.25 μm). The initial column temperature is set to 60 °C and increased at a rate of 5 °C/min to 250 °C, where it was held for 10 minutes. Mass spectrometry was performed using electron ionization (EI) with a split ratio of 20:1, and the scan range was from m/z 35 to 550.

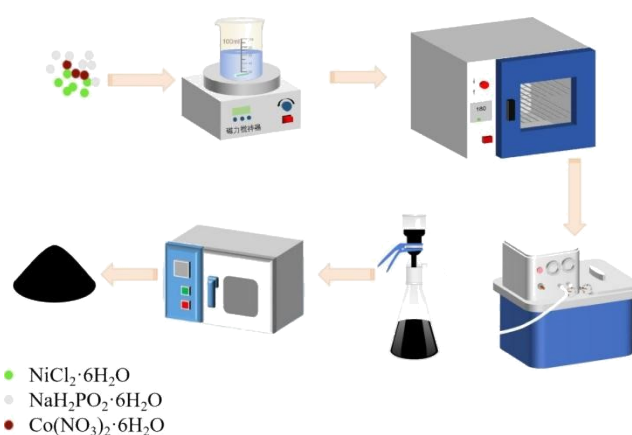

Figure S1. Schematic diagram illustrating the synthesis of x% Co-Ni<sub>12</sub>P<sub>5</sub>.

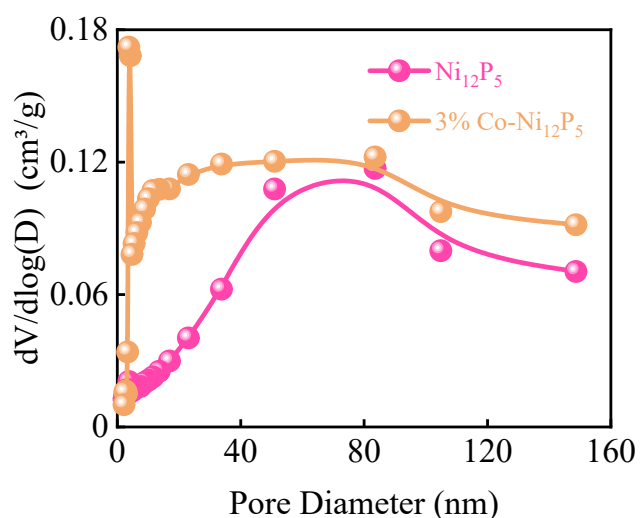

Figure S2. Pore size distribution of Ni<sub>12</sub>P<sub>5</sub> and 3% Co-Ni<sub>12</sub>P<sub>5</sub>.

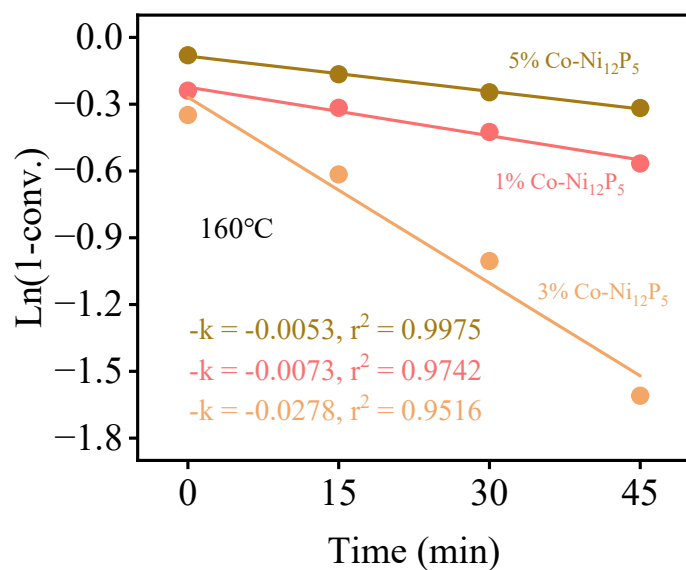

Figure S3. Pseudo-first-order kinetic fitting at different cobalt contents (100 mg BPE, 20 mL n-hexane, 50 mg x% Co-Ni<sub>12</sub>P<sub>5</sub>, 160 °C, 1.5 MPa H<sub>2</sub>).

Table S1 The specific surface area and porosity of Ni<sub>12</sub>P<sub>5</sub> and 3% Co-Ni<sub>12</sub>P<sub>5</sub>

| Sample                                | S <sub>BET</sub> (m <sup>2</sup> /g) | D <sub>pore</sub> (nm) | V <sub>total</sub> (cm <sup>3</sup> /g) | <sup>a</sup> particle size(nm) |
|---------------------------------------|--------------------------------------|------------------------|-----------------------------------------|--------------------------------|
| Ni <sub>12</sub> P <sub>5</sub>       | 18.28                                | 21.44                  | 0.10                                    | 23.94                          |
| 3% Co-Ni <sub>12</sub> P <sub>5</sub> | 52.79                                | 14.49                  | 0.02                                    | 11.28                          |

a : Measured by TEM

Table S2 Acid amounts of Ni<sub>12</sub>P<sub>5</sub> and 3% Co-Ni<sub>12</sub>P<sub>5</sub>

| Sample                                | Acidity<br>(mmol NH <sub>3</sub> g <sup>-1</sup> ) |                              | Total<br>(mmol NH <sub>3</sub> g <sup>-1</sup> ) |      |
|---------------------------------------|----------------------------------------------------|------------------------------|--------------------------------------------------|------|
|                                       | Weak acid (<230 °C)                                | Moderately acid (230-500 °C) |                                                  |      |
| Ni <sub>12</sub> P <sub>5</sub>       | 36.84                                              | 42.12                        | 21.04                                            | 100  |
|                                       | 0.07                                               | 0.08                         | 0.04                                             | 0.19 |
| 3% Co-Ni <sub>12</sub> P <sub>5</sub> | 56.41                                              | 15.38                        | 28.21                                            | 100  |
|                                       | 0.22                                               | 0.06                         | 0.11                                             | 0.39 |

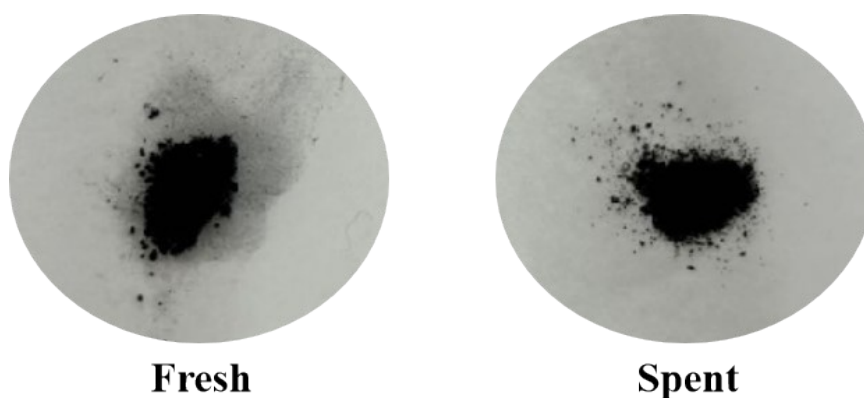

Figure S4. Color comparison of 3% Co- Ni<sub>12</sub>P<sub>5</sub> before and after reaction.

Table S3 ICP analysis of the reaction filtrate for Co, Ni, and P leaching from 3% Co-Ni<sub>12</sub>P<sub>5</sub> after catalytic hydrogenation

| Sample                                | P (ug/g) | Co (ug/g) | Ni (ug/g) |
|---------------------------------------|----------|-----------|-----------|
| 3% Co-Ni <sub>12</sub> P <sub>5</sub> | -        | 0.005     | 0.224     |
